# Supplementary material for: Frequency Response of a Protein to Local Conformational Perturbations
Source: PubMed Central journal article supplement (PMC3784495; doi:10.1371/journal.pcbi.1003238), 2013-09-26
Supplement: pcbi.1003238.s002.pdf [file pcbi.1003238.s002.pdf]

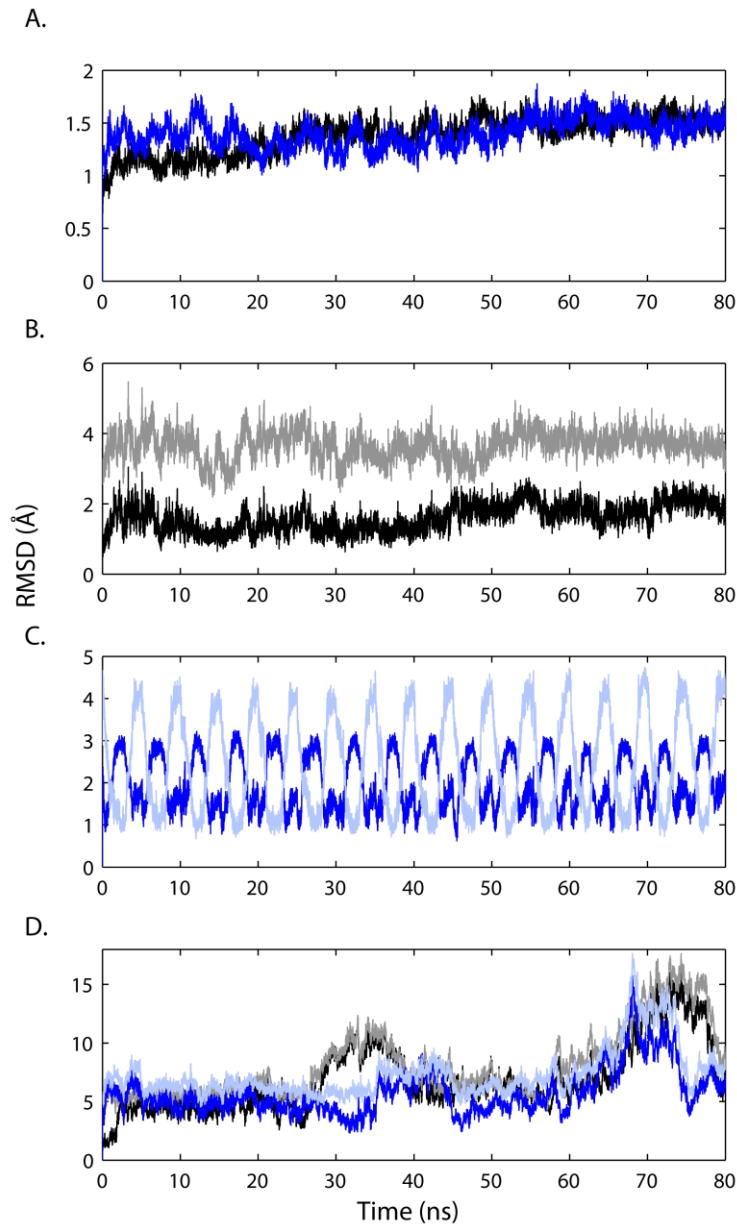

**Figure S2. RMSD of various structural elements of PTP1B in EMD and TMD<sub>1</sub> simulations from crystal structures.** (A) RMSD of PTP1B in MD (black) and TMD<sub>1</sub> (blue) simulations from the WPD<sub>open</sub> crystal structure (PDB ID: 2F6F). (B) RMSD of the WPD loop in EMD simulation from WPD<sub>open</sub> (black) and WPD<sub>closed</sub> (gray, PDB ID: 1SUG) crystal structures. (C) RMSD of the WPD loop in TMD<sub>1</sub> simulation from WPD<sub>open</sub> (dark blue) and WPD<sub>closed</sub> (light blue) crystal structures. (D) RMSD of α7 (residues 281 to 298) in EMD simulation from WPD<sub>open</sub> (black) and WPD<sub>closed</sub> (gray) crystal structures. RMSD of the same region in TMD<sub>1</sub> simulation from WPD<sub>open</sub> (dark blue) and WPD<sub>closed</sub> (light blue) crystal structures. Disordered nature of α7 is confirmed by EMD and TMD simulations.
