# Supplementary material for: Frequency Response of a Protein to Local Conformational Perturbations
Source: PubMed Central journal article supplement (PMC3784495; doi:10.1371/journal.pcbi.1003238), 2013-09-26
Supplement: pcbi.1003238.s004.pdf [file pcbi.1003238.s004.pdf]

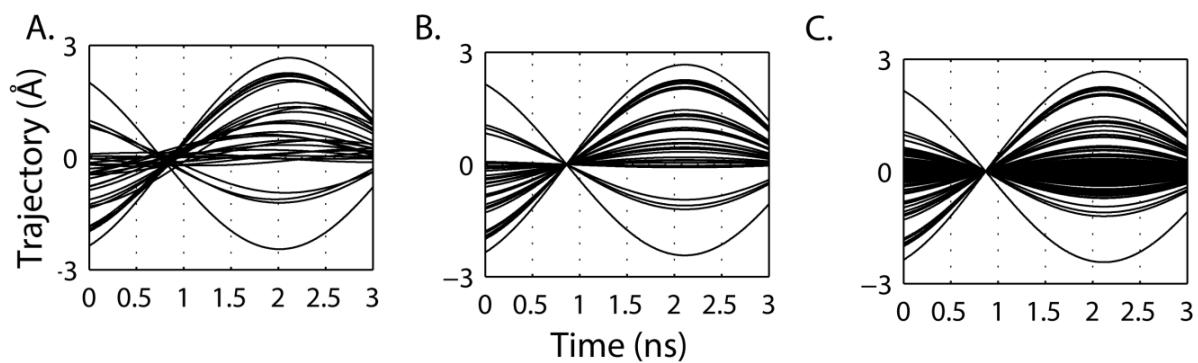

**Figure S4. Transformation of reconstructed trajectories to reconstructed in-phase trajectories using PCA.** (A) Reconstructed trajectories of three-Cartesian components of WPD loop  $C_{\alpha}$  atoms. (B) In-phase components obtained by employing PCA on the trajectories shown in (A). (C) In-phase components obtained by employing PCA on the reconstructed trajectories of  $C_{\alpha}$  atoms between residues 2 to 278.
