# Supplementary material for: Frequency Response of a Protein to Local Conformational Perturbations
Source: PubMed Central journal article supplement (PMC3784495; doi:10.1371/journal.pcbi.1003238), 2013-09-26
Supplement: pcbi.1003238.s005.pdf [file pcbi.1003238.s005.pdf]

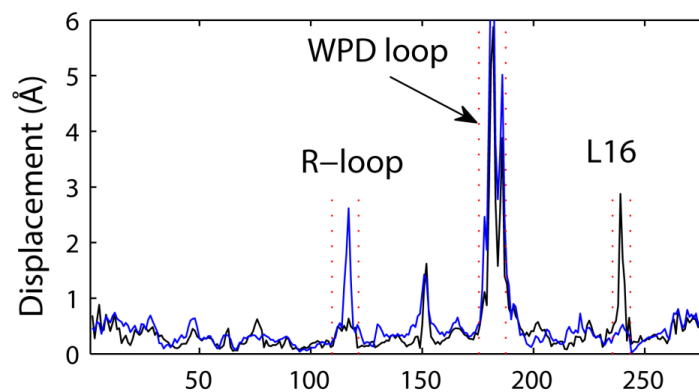

**Figure S5. Comparison of estimated and experimental  $C_\alpha$  displacement amplitudes.**

Amplitudes of  $C_\alpha$  displacements estimated using reconstructed in-phase trajectories are compared with displacements obtained from the averages of all crystal structures in  $WPD_{open}$  and  $WPD_{closed}$  conformation listed in Table S1. Estimated and experimental displacements are shown in blue and black, respectively.
