# Supplementary material for: Frequency Response of a Protein to Local Conformational Perturbations
Source: PubMed Central journal article supplement (PMC3784495; doi:10.1371/journal.pcbi.1003238), 2013-09-26
Supplement: pcbi.1003238.s006.pdf [file pcbi.1003238.s006.pdf]

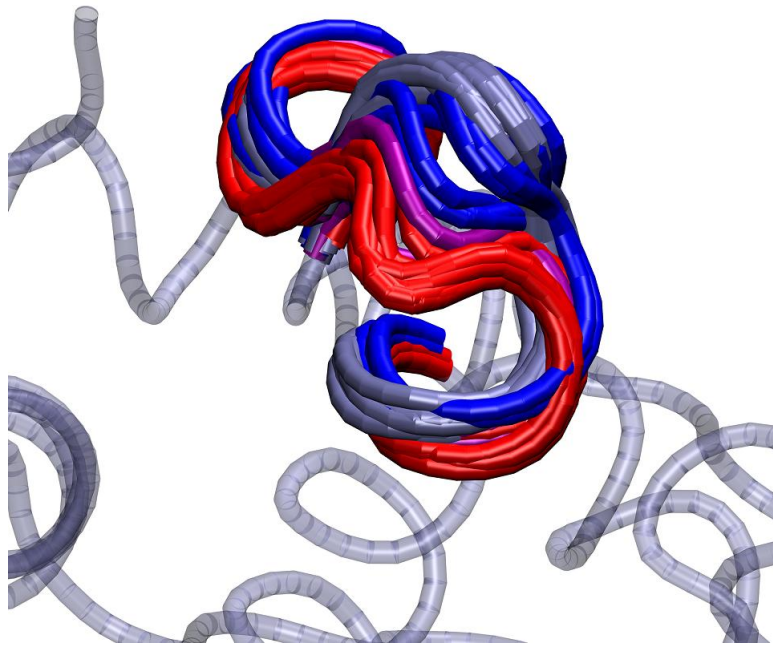

**Figure S6. Different conformations of L16 (Asp236 to Ser243) adopted in crystal structures.** Blue and red represent L16<sub>I</sub> and L16<sub>II</sub> conformations adopted in WPD<sub>closed</sub> crystal structures, respectively, while ice blue and purple represents L16<sub>I</sub> and L16<sub>II</sub> conformations adopted in WPD<sub>open</sub> crystal structures, respectively.
