# Supplementary material for: Frequency Response of a Protein to Local Conformational Perturbations
Source: PubMed Central journal article supplement (PMC3784495; doi:10.1371/journal.pcbi.1003238), 2013-09-26
Supplement: pcbi.1003238.s007.pdf [file pcbi.1003238.s007.pdf]

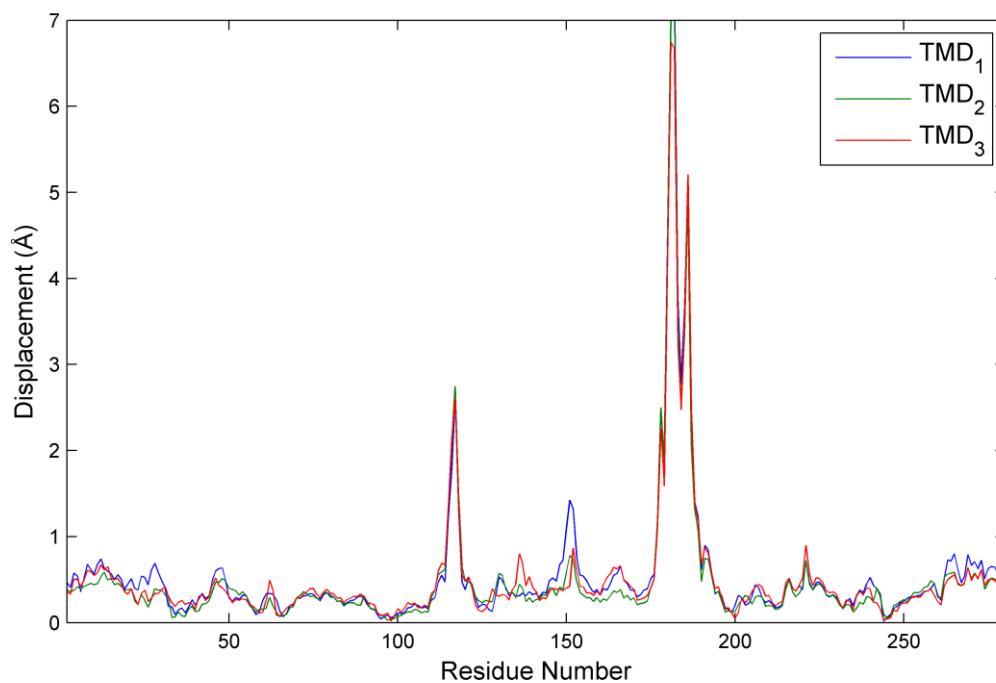

**Figure S7. Amplitude of residue displacements predicted from low-frequency TMD simulations.** TMD<sub>1</sub> (blue), TMD<sub>2</sub> (green) and TMD<sub>3</sub> (red) simulations correspond to cycling periods of 5 ns, 2 ns, and 1.2 ns, respectively.
