# Supplementary material for: Frequency Response of a Protein to Local Conformational Perturbations
Source: PubMed Central journal article supplement (PMC3784495; doi:10.1371/journal.pcbi.1003238), 2013-09-26
Supplement: pcbi.1003238.s008.pdf [file pcbi.1003238.s008.pdf]

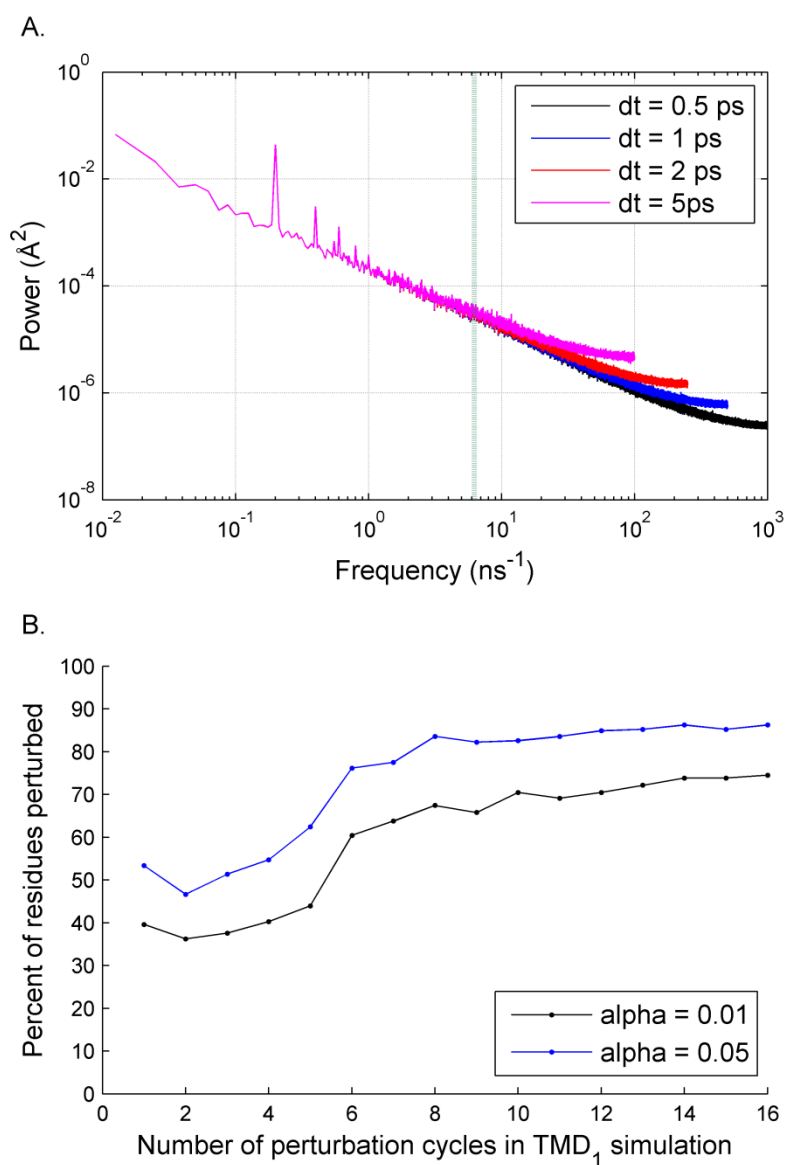

**Figure S8. Effect of sampling interval and perturbation frequency on the frequency response of residues in TMD<sub>1</sub>.** (A) Power spectral density of all residues except  $\alpha 7$  sampled at 0.5, 1, 2 and 5 ps intervals. Vertical green dotted lines intersecting the frequency axis at  $\sim 6$  ns<sup>-1</sup> represent the upper frequency limit of power spectrum which is assumed to obey  $1/f^n$  distribution. (B) Percent of perturbed C <sub>$\alpha$</sub>  atoms identified using different number of TMD simulation cycles ranging from one to 16.
