# Supplementary material for: Frequency Response of a Protein to Local Conformational Perturbations
Source: PubMed Central journal article supplement (PMC3784495; doi:10.1371/journal.pcbi.1003238), 2013-09-26
Supplement: pcbi.1003238.s009.pdf [file pcbi.1003238.s009.pdf]

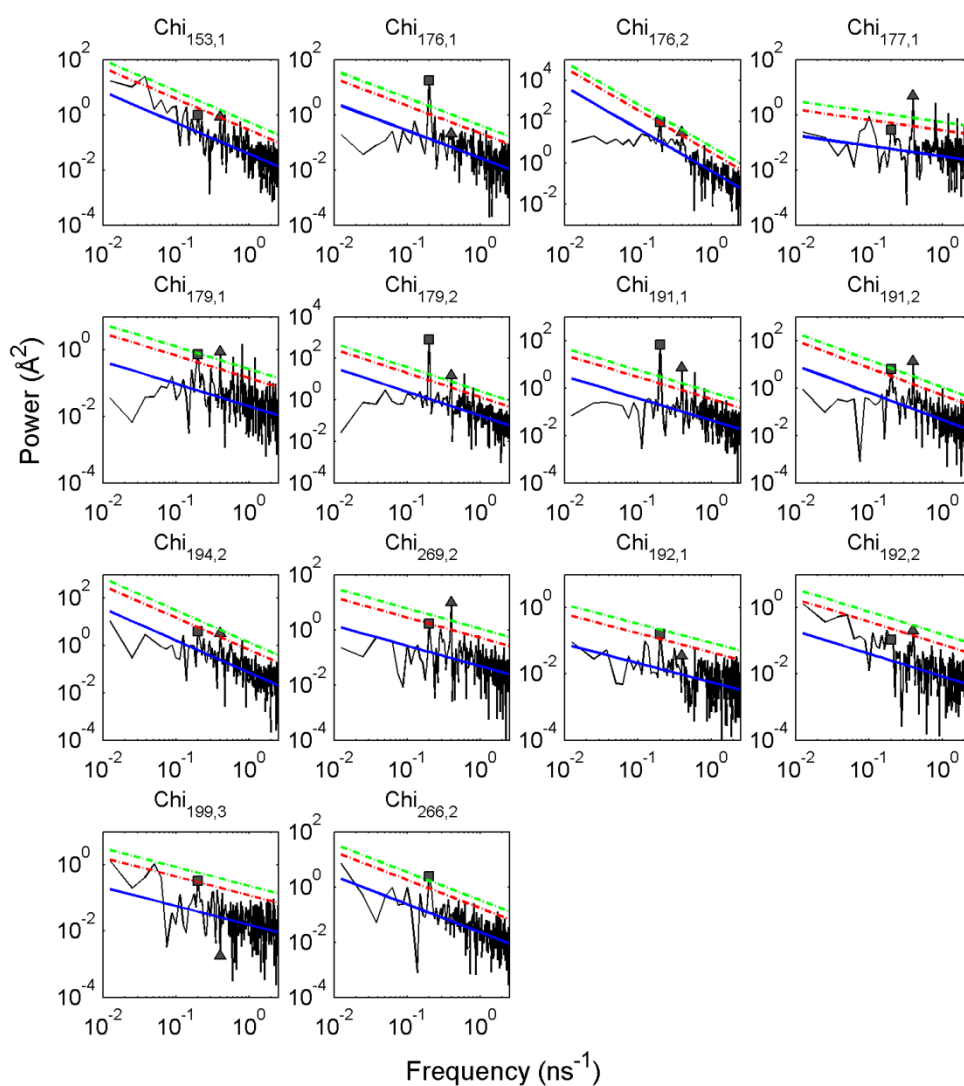

**Figure S9. Power spectral density of various perturbed side-chain dihedral angles in the vicinity of WPD loop.** Power component at 0.2 and 0.4  $\text{ns}^{-1}$  are denoted by a square and a triangle, respectively.
