# Supplementary material for: Frequency Response of a Protein to Local Conformational Perturbations
Source: PubMed Central journal article supplement (PMC3784495; doi:10.1371/journal.pcbi.1003238), 2013-09-26
Supplement: pcbi.1003238.s010.pdf [file pcbi.1003238.s010.pdf]

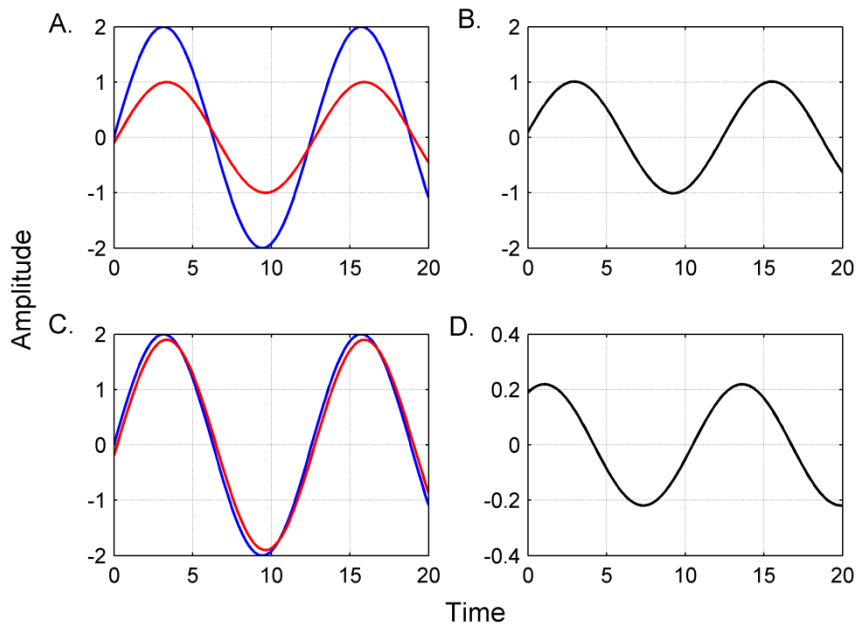

**Figure S10. Sensitivity of phase angles of interatomic distances to amplitudes of atomic fluctuations.** (A) Two approximately in-phase signals (atomic positions) with a phase difference of  $\pi/33$  and a unit difference between their amplitudes, and (B) difference (interatomic distance) between the amplitudes of these two signals; new signal is also approximately in-phase with the first two signals. (C) Two approximately in-phase signals with a phase difference of  $\pi/33$  and 5% difference between their amplitudes, and (D) difference between the amplitudes of these two signals; phase difference between new signal and the first two signals is approximately  $\pi/2$ .
