# Supplementary material for: Frequency Response of a Protein to Local Conformational Perturbations
Source: PubMed Central journal article supplement (PMC3784495; doi:10.1371/journal.pcbi.1003238), 2013-09-26
Supplement: pcbi.1003238.s011.pdf [file pcbi.1003238.s011.pdf]

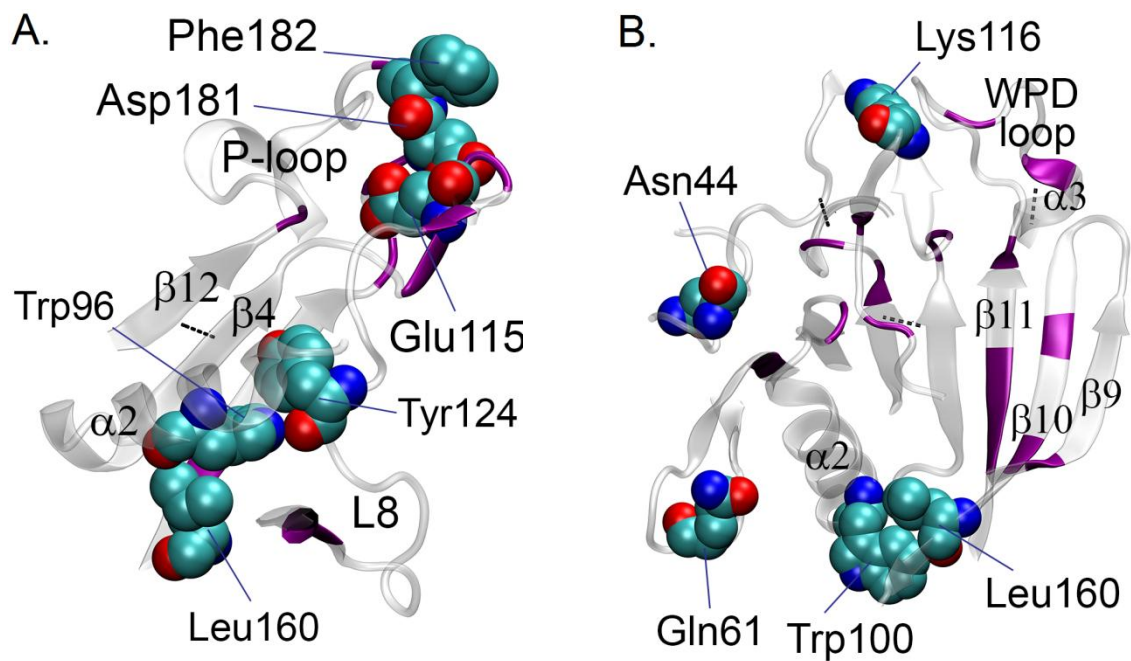

**Figure S11. Atomic representations of in-phase fluctuating residues in the third and fourth clusters of atomic variables.** (A) The third cluster of in-phase fluctuations consists of coupled motions of the backbone of R-loop, side-chains of Asp181, Phe182 on the WPD loop, and Trp96, Tyr124 and Leu160, which make hydrophobic interactions. (B) The fourth cluster of in-phase fluctuations consists of coupled motions of the backbones of  $\beta_9$ ,  $\beta_{10}$  and  $\beta_{11}$  and side-chains of Asn44, Gln61, Trp100 and Leu160. Out of these four residues, the last two make hydrophobic contacts. In both figures, residues with perturbed side-chains are colored with respect their atoms (nitrogen in blue, oxygen in red, carbon in gray), regions of backbones with perturbed dihedral angles are colored in purple, and perturbed H-bonds are shown with black dashed lines.
