# Supplementary material for: Frequency Response of a Protein to Local Conformational Perturbations
Source: PubMed Central journal article supplement (PMC3784495; doi:10.1371/journal.pcbi.1003238), 2013-09-26
Supplement: pcbi.1003238.s018.pdf [file pcbi.1003238.s018.pdf]

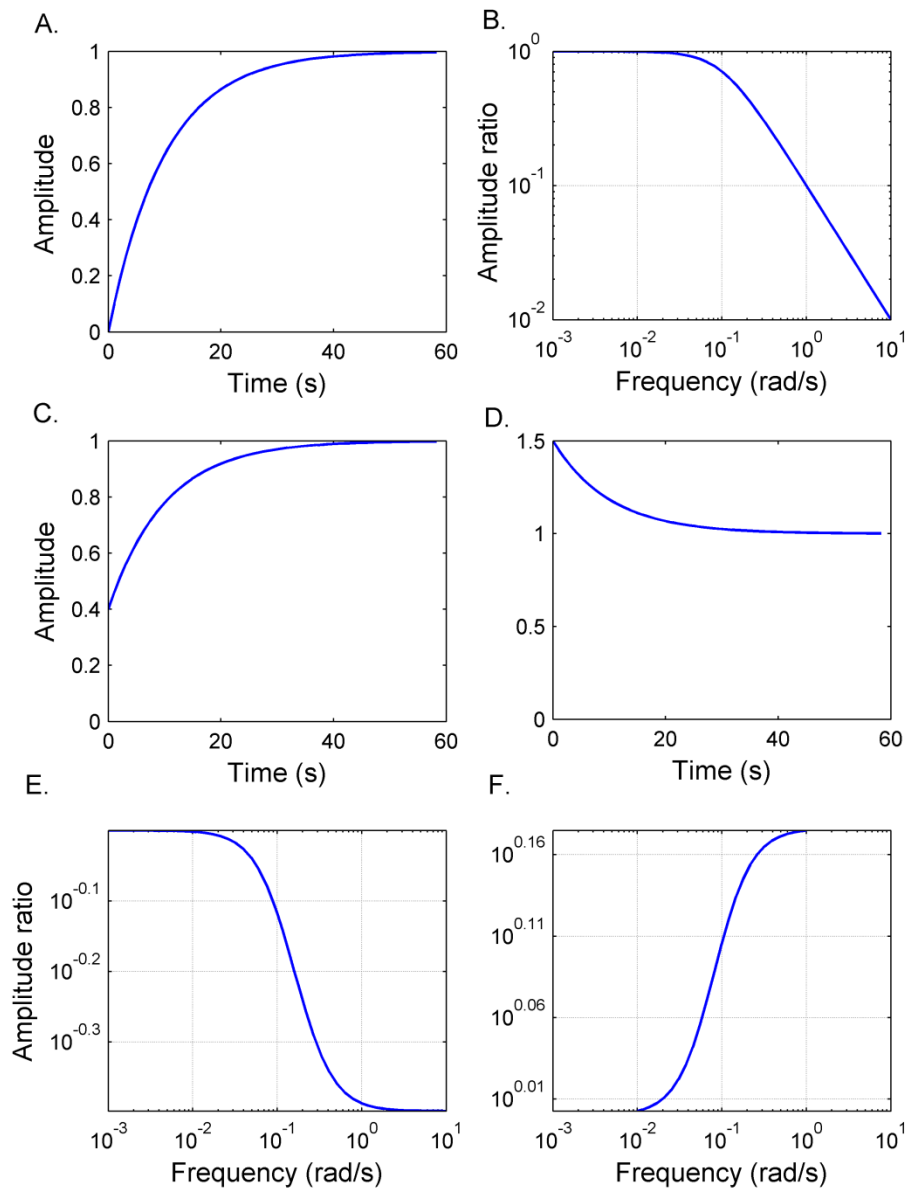

**Figure S18. Time and frequency domain responses of first order lag and lead-lag systems.** (A) Step, and (B) frequency responses of a first order lag system. In (B), breakpoint frequency is equal to  $1/\tau_p = 0.1$  rad/s. Unit step responses of lead-lag processes with (C)  $\tau_z/\tau_p < 1$ , and (D)  $\tau_z/\tau_p > 1$ . Magnitude Bode plots of lead-lag processes with (E)  $\tau_z/\tau_p < 1$ , and (F)  $\tau_z/\tau_p > 1$ .
