# Supplementary material for: Frequency Response of a Protein to Local Conformational Perturbations
Source: PubMed Central journal article supplement (PMC3784495; doi:10.1371/journal.pcbi.1003238), 2013-09-26
Supplement: pcbi.1003238.s019.pdf [file pcbi.1003238.s019.pdf]

**Table S1. PDB IDs of the crystal structures used in the current study.**

| WPD <sub>open</sub> and L16 <sub>I</sub><br>conformation <sup>(a)</sup>                                                                  | WPD <sub>open</sub> and L16 <sub>II</sub><br>conformation <sup>(b)</sup> | WPD <sub>closed</sub> and L16 <sub>I</sub><br>conformation <sup>(c)</sup>                            | WPD <sub>closed</sub> and L16 <sub>II</sub><br>conformation <sup>(d)</sup>                                                                     |
|------------------------------------------------------------------------------------------------------------------------------------------|--------------------------------------------------------------------------|------------------------------------------------------------------------------------------------------|------------------------------------------------------------------------------------------------------------------------------------------------|
| 1BZH, 1NNY, 1NO6,<br>1NWL, 1NZ7, 1ONY,<br>1ONZ, 1PH0, 1JF7,<br>1NL9, 1OEO, 1OET,<br>1OEU, 1OEV, 1PYN,<br>1T48, 1T49, 1T4J,<br>2CM2, 2F6F | 1G7F, 2HNP, 2HNQ                                                         | 1EEN, 1G1F, 1G1G,<br>1G1H, 1G7G, 1KAK,<br>1KAV, 1PXH, 2CMA,<br>2VEU, 2VEV, 2CM7,<br>2VEW, 2VEX, 2VEY | 1AAX, 1BZC, 1C83,<br>1C84, 1C85, 1C86,<br>1C87, 1ECV, 1GFY,<br>1L8G, 1PTT, 1PTU,<br>1PTY, 1Q1M, 1SUG,<br>1WAX, 1XBO, 2AZR,<br>2F6T, 2F71, 2NTA |

<sup>(a)</sup> WPD loop adopts open conformation and L16 adopts L16<sub>I</sub> conformation.

<sup>(b)</sup> WPD loop adopts open conformation and L16 adopts L16<sub>II</sub> conformation.

<sup>(c)</sup> WPD loop adopts closed conformation and L16 adopts L16<sub>I</sub> conformation.

<sup>(d)</sup> WPD loop adopts closed conformation and L16 adopts L16<sub>II</sub> conformation.
