# Supplementary material for: Frequency Response of a Protein to Local Conformational Perturbations
Source: PubMed Central journal article supplement (PMC3784495; doi:10.1371/journal.pcbi.1003238), 2013-09-26
Supplement: pcbi.1003238.s020.pdf [file pcbi.1003238.s020.pdf]

**Table S2. Overlap of residue displacements of reconstructed trajectories determined from low frequency TMD simulations.**

| Overlap of the first eigenvectors             | Residues 2 to 278 | R and WPD loops excluded |
|-----------------------------------------------|-------------------|--------------------------|
| $P_{\text{TMD1}}^{(a)}$ and $P_{\text{TMD2}}$ | 0.98              | 0.91                     |
| $P_{\text{TMD1}}$ and $P_{\text{TMD3}}$       | 0.98              | 0.92                     |
| $P_{\text{TMD2}}$ and $P_{\text{TMD3}}$       | 0.98              | 0.92                     |

<sup>(a)</sup> List of TMD simulations is given in Table S4.  $P_{\text{TMD1}}$ , for instance, denotes the first eigenvector determined from the reconstructed trajectories in TMD<sub>1</sub>.
