# Supplementary material for: Frequency Response of a Protein to Local Conformational Perturbations
Source: PubMed Central journal article supplement (PMC3784495; doi:10.1371/journal.pcbi.1003238), 2013-09-26
Supplement: pcbi.1003238.s021.pdf [file pcbi.1003238.s021.pdf]

**Table S3. Number of perturbed  $C_\alpha$  atoms determined from low frequency TMD simulations.**

| TMD simulations  | TMD <sub>1</sub>       | TMD <sub>2</sub>       | TMD <sub>3</sub> |
|------------------|------------------------|------------------------|------------------|
| TMD <sub>1</sub> | <sup>(a)</sup> 257/222 | <sup>(b)</sup> 233/200 | 238/197          |
| TMD <sub>2</sub> |                        | 248/211                | 229/196          |
| TMD <sub>3</sub> |                        |                        | 256/221          |

<sup>(a)</sup> Diagonal elements are the numbers of  $C_\alpha$  atoms perturbed at  $\alpha = 0.05$  and  $\alpha = 0.01$  (separated by slash), respectively, in the simulation represented by the corresponding row or column.

<sup>(b)</sup> Off-diagonal elements are the numbers of common  $C_\alpha$  atoms perturbed at  $\alpha = 0.05$  and  $\alpha = 0.01$  (separated by slash), respectively, in both simulations represented by the corresponding row and column.
