# Supplementary material for: Frequency Response of a Protein to Local Conformational Perturbations
Source: PubMed Central journal article supplement (PMC3784495; doi:10.1371/journal.pcbi.1003238), 2013-09-26
Supplement: pcbi.1003238.s022.pdf [file pcbi.1003238.s022.pdf]

**Table S4. List of TMD simulations performed and analyzed in the current study.**

| TMD simulations   | Cycling period (ps) | Frequency ( $f_o$ ) ( $\text{ns}^{-1}$ ) | Frequency <sup>(a)</sup> ( $w_o$ ) (rad/ns) | Total simulation period <sup>(b)</sup> (ns) |
|-------------------|---------------------|------------------------------------------|---------------------------------------------|---------------------------------------------|
| TMD <sub>1</sub>  | 5000                | 0.200                                    | 1.26                                        | 80.0                                        |
| TMD <sub>2</sub>  | 2000                | 0.500                                    | 3.14                                        | 32.0                                        |
| TMD <sub>3</sub>  | 1200                | 0.833                                    | 5.23                                        | 19.2                                        |
| TMD <sub>4</sub>  | 800                 | 1.25                                     | 7.9                                         | 12.8                                        |
| TMD <sub>5</sub>  | 500                 | 2.00                                     | 12.6                                        | 8.00                                        |
| TMD <sub>6</sub>  | 350                 | 2.86                                     | 17.9                                        | 5.60                                        |
| TMD <sub>7</sub>  | 200                 | 5.00                                     | 31.4                                        | 3.20                                        |
| TMD <sub>8</sub>  | 150                 | 6.67                                     | 41.9                                        | 2.40                                        |
| TMD <sub>9</sub>  | 100                 | 10.0                                     | 62.8                                        | 1.60                                        |
| TMD <sub>10</sub> | 70                  | 14.3                                     | 89.7                                        | 1.12                                        |
| TMD <sub>11</sub> | 50                  | 20.0                                     | 126                                         | 0.80                                        |
| TMD <sub>12</sub> | 40                  | 25.0                                     | 157                                         | 0.64                                        |
| TMD <sub>13</sub> | 30                  | 33.3                                     | 209                                         | 0.48                                        |

<sup>(a)</sup> Power spectral density and Bode plots are plotted with respect to frequencies represented in  $\text{ns}^{-1}$  and rad/ns, respectively.

<sup>(b)</sup> Total simulation period is  $16 \times$  cycling period for each simulation, corresponding to 16 cycles of WPD loop opening and closing motion.
