# Supplementary material for: Frequency Response of a Protein to Local Conformational Perturbations
Source: PubMed Central journal article supplement (PMC3784495; doi:10.1371/journal.pcbi.1003238), 2013-09-26
Supplement: pcbi.1003238.s023.pdf [file pcbi.1003238.s023.pdf]

**Table S5. Classification of magnitude Bode plot data of C<sub>α</sub> atoms.**

| Type of function to which frequency response data may be fitted | Percentage of residues modeled with lead-lag transfer functions | Percentage of residues not modeled with lead-lag transfer functions |
|-----------------------------------------------------------------|-----------------------------------------------------------------|---------------------------------------------------------------------|
| Monotonic decreasing                                            | 55                                                              | 25                                                                  |
| Monotonic increasing                                            | 5.0                                                             | 3.3                                                                 |
| No trend                                                        | -                                                               | 7.8                                                                 |
| Concave                                                         | -                                                               | 3.9                                                                 |
