# Supplementary material for: Frequency Response of a Protein to Local Conformational Perturbations
Source: PubMed Central journal article supplement (PMC3784495; doi:10.1371/journal.pcbi.1003238), 2013-09-26
Supplement: pcbi.1003238.s025.pdf [file pcbi.1003238.s025.pdf]

## **Text S2. Conformations of L16 adopted in the crystal structures of PTP1B**

Average conformations adopted in the  $WPD_{open}$  and  $WPD_{closed}$  crystal structures (Table S1) were determined, and amplitude of  $C_{\alpha}$  atomic displacements ( $D$ ) between these two structures computed. Correlation of the experimental and predicted amplitudes of displacements of residues 2 to 278 was found to be 0.91. A more reliable metric may be obtained when R and WPD loop regions are excluded from this comparison, since TMD potential was directly applied on these regions. Excluding these two regions, correlation of residue displacement profiles was found to be 0.57. Figure S5 showed L16 was the only region showing a significant discrepancy between experimental and predicted residue displacements. Visualization of the crystal structures shows (Figure S6) that L16, at a distance of  $\sim 30\text{-}40$  Å from Asp181, may adopt two different conformations. In 15 crystal structures of  $WPD_{closed}$  conformation, L16 adopts a conformation ( $L16_I$ ) similar to that seen in 20 of the  $WPD_{open}$  crystal structures, with a RMSD of 0.49 Å between the conformation averages of each group. In 21 crystal structures of  $WPD_{closed}$  conformation and three structures of  $WPD_{open}$  conformation, on the other hand, L16 adopts an alternative conformation ( $L16_{II}$ ), with a RMSD of 2.4 Å from the average conformation of L16 in  $WPD_{open}$  crystal structures. This shows that the conformational transitions seen in L16 and WPD loop are not necessarily coupled, and L16 may adopt different conformations in  $WPD_{closed}$  and, to a lesser extent, in  $WPD_{open}$  crystal structures. The initial  $WPD_{open}$  crystal structure in all TMD simulations adopted  $L16_I$  conformation, and L16 did not make a transition to  $L16_{II}$  conformation in any of the TMD simulations. Hence, the total set of experimental structures was reduced to a set of crystal structures only in  $L16_I$  conformation to be used in comparison with the current method predictions, and a higher consistency between computations and experiments were obtained (see Figure 1D and Table 1).
