# Supplementary material for: Frequency Response of a Protein to Local Conformational Perturbations
Source: PubMed Central journal article supplement (PMC3784495; doi:10.1371/journal.pcbi.1003238), 2013-09-26
Supplement: pcbi.1003238.s026.pdf [file pcbi.1003238.s026.pdf]

### **Text S3. Determination of a single reconstructed trajectory for each $C_{\alpha}$ atom**

Fluctuations of  $C_{\alpha}$  atoms on the base frequency have to be treated separately for each  $C_{\alpha}$  atom to obtain single filtered trajectories. The first eigenvector obtained by employing PCA on the three reconstructed Cartesian coordinates of a  $C_{\alpha}$  atom gives the principal (dominant) motion of that  $C_{\alpha}$  atom. If the first eigenvalue is sufficiently larger than the other two, then it may be assumed that the first eigenvector can faithfully represent the fluctuations of the  $C_{\alpha}$  atom, on which PCA has been employed. Hence, PCA was employed on the three Cartesian coordinates of each  $C_{\alpha}$  atom of residues between Met1 and Asp298. For 272  $C_{\alpha}$  atoms, the first eigenvector was found to explain more than 75% of the fluctuations, justifying that three Cartesian coordinates can be reduced to a single residue coordinate. Since dihedral angles and H-bond distances can each be represented by single variables, such a complication does not arise for these variables.
