# Supplementary material for: Frequency Response of a Protein to Local Conformational Perturbations
Source: PubMed Central journal article supplement (PMC3784495; doi:10.1371/journal.pcbi.1003238), 2013-09-26
Supplement: pcbi.1003238.s029.pdf [file pcbi.1003238.s029.pdf]

### Text S6. Relation between power of a signal and atomic MSF

In the current study, atomic position, dihedral angle, and atomic distance trajectory signals are processed, so a more convenient measure than energy may be mean square fluctuations (MSF). When the signal is mean-centered, i.e. deviation of the trajectory from its mean value, MSF is equivalent to the power of the signal:

$$\text{MSF} = \frac{1}{N} \sum_{n=0}^{N-1} |x_n|^2 = \frac{E}{N} = P \quad (\text{S1})$$

$$\text{MSF} = P = \frac{E}{N} = \frac{1}{N^2} \sum_{k=0}^{N-1} |X_k|^2 = \sum_{k=0}^{N-1} \left| \frac{X_k}{N} \right|^2 \quad (\text{S2})$$

By this way, contribution of  $k^{\text{th}}$  sinusoidal component to the MSF of the trajectory is found to be equal to  $\left| \frac{X_k}{N} \right|^2$ . DFT may be applied to each of the three Cartesian coordinates ( $r = 1, 2, 3$ ) of an atom.

$$X_n^r = \sum_{n=0}^{N-1} x_n^r e^{-\frac{i2\pi kn}{N}} \quad (\text{S3})$$

In this case, MSF of a single atom, using Parseval's relation, can be obtained by

$$\text{MSF} = \sum_{r=1}^3 \frac{1}{N} \sum_{n=0}^{N-1} |x_n^r|^2 = \sum_{r=1}^3 \sum_{k=0}^{N-1} \left| \frac{X_k^r}{N} \right|^2 = \sum_{k=0}^{N-1} \sum_{r=1}^3 \left| \frac{X_k^r}{N} \right|^2 \quad (\text{S4})$$

Here, the contribution of the  $k^{\text{th}}$  sinusoidal component to the MSF of an atom (power at the  $k^{\text{th}}$  frequency component) is equal to  $\sum_{r=1}^3 \left| \frac{X_k^r}{N} \right|^2$ . Generalization of this equation to  $R$  number of  $C_\alpha$

atoms corresponding to a specific region in the protein, contribution of the  $k^{\text{th}}$  sinusoidal component to the residue-averaged MSF can be computed by  $\frac{1}{R} \sum_{r=1}^{3R} \left| \frac{X_k^r}{N} \right|^2$ .
