# Supplementary material for: Frequency Response of a Protein to Local Conformational Perturbations
Source: PubMed Central journal article supplement (PMC3784495; doi:10.1371/journal.pcbi.1003238), 2013-09-26
Supplement: pcbi.1003238.s030.pdf [file pcbi.1003238.s030.pdf]

### **Text S7. Time and frequency responses of first order lag and lead-lag systems**

Step and frequency responses of a first order lag and a lead-lag system are analyzed to have a better insight of the dynamics of these two systems. Step response of a first order system (with  $K_p=1$ ) shows an increase from the zero initial position to a constant steady state value, and speed of convergence is determined by time constant  $\tau_p$  (Figure S18A). Frequency response (Figure S18B) shows that output amplitude converges to a constant value for frequencies lower than the breakpoint frequency ( $=1/\tau_p$ ), while higher frequency inputs are attenuated.

When the lead element in the transfer function is written as a superposition of a gain and a first order lag process (Equation 14), it is easier to determine the contribution of each element to the lead-lag transfer function. The gain element ( $\tau_z/\tau_p$ ) will give an instantaneous response, while the contribution of the first order lag element to the output will build up in time, proportional to  $\tau_p$ . Therefore, if  $\tau_z/\tau_p$  ratio is smaller than unity, then the gain of the first order lag element will be positive and contributions of both elements to the step response will be in the same direction (Figure S18C). If, on the other hand,  $\tau_z/\tau_p$  ratio is larger than unity, then the gain of the first order lag element will be negative, and the output, again starting from a positive value at  $t = 0$ , will move closer to its previous equilibrium state (Figure S18D). For lead-lag systems with  $\tau_z/\tau_p$  ratio smaller than unity, frequency response is similar to that of first-order lag systems for frequencies lower than  $1/\tau_p$  (Fig. S18E). For lead-lag systems with  $\tau_z/\tau_p$  ratio higher than unity, input fluctuations are magnified in high frequencies (Figure S18F).
